# Supplementary material for: Two-dimensional fullerene-based monolayer materials assembled by C80 and Sc3N@C80
Source: Royal Society of Chemistry journal article supplement (doi:10.1039/d3cp04028c), 2024-01-01
Supplement: d3cp04028c5.pdf [file d3cp04028c5.pdf]

## Supporting Information

### Two-dimensional fullerene-based monolayer materials assembled by $C_{80}$ and $Sc_3N@C_{80}$

Yang Zhao<sup>a</sup>, Yu Guo<sup>a</sup>, Yanyan Zhao<sup>a</sup>, Xueke Yu<sup>a</sup>, Nikolai Cherenda<sup>b</sup>, Yan Su<sup>\*a</sup>, Jijun Zhao<sup>\*a</sup>

<sup>a</sup> Key Laboratory of Materials Modification by Laser, Ion and Electron Beams (Dalian University of Technology), Ministry of Education, Dalian 116024, China

<sup>b</sup> Physics Faculty, Belarusian State University, Minsk 116699, The Republic of Belarus

### Corresponding Author

\*su.yan@dlut.edu.cn

\*zhaojj@dlut.edu.cn

## Supplementary Note1: Calculation of carrier mobility

To characterize the performance of semiconductor transistors, we calculate carrier mobility of 2D monolayers based on the deformation potential theory as follows:

$$\mu = \frac{e\hbar^3 C_{2D}}{k_B T m m_d (E_1)^2} \quad (1)$$

where  $e$  is the electron charge,  $\hbar$  is the reduced Planck constant,  $k_B$  is the Boltzmann constant,  $T$  is the temperature,  $m$  is the effective mass along the transport direction,  $m_d = \sqrt{m_x m_y}$  is the average effective mass,  $C_{2D} = 2[\partial^2 E / \partial (\Delta l / l_0)^2] / S_0$  is the elastic modulus.  $E$  and  $S_0$  stand for the total energy and the area of the xy plane for the unit, respectively.  $E_1 = \Delta V / (\Delta l / l_0)$  represents the deformation potential constant, defined as the shift of band edges induced by strain.  $\Delta V$  is the energy difference about conduction band minimum (CBM) or valence band maximum (VBM) with the lattice applied by proper dilatation or compression.  $l_0$  and  $\Delta l$  are the lattice constant along the x or y direction and their deformation, respectively.

## Supplementary Note2: Calculation of the formation energy and deformation energy by atom-wise energies

The formation energy ( $E_{f\text{-atom}}$ ) and deformation energy ( $E_{d\text{-atom}}$ ) are defined by atom-wise energies, as follows:

$$E_{f\text{-atom}} = E_{2D}/n' - E_C \quad (2)$$

where  $E_{2D}$  and  $E_C$  are the energies of 2D monolayer and C atoms, respectively.  $n'$  is the number of C atoms in the unit cell.

$$E_{d\text{-atom}} = E_{2D\text{-def-cage}}/n' - E_{\text{cage}}/n' \quad (3)$$

where  $E_{2D\text{-def-cage}}$  and  $E_{\text{cage}}$  are the energies of the deformed cage in 2D structures and the standalone cage in its ground state configuration, respectively.  $n'$  is the number of C atoms in the unit cell.

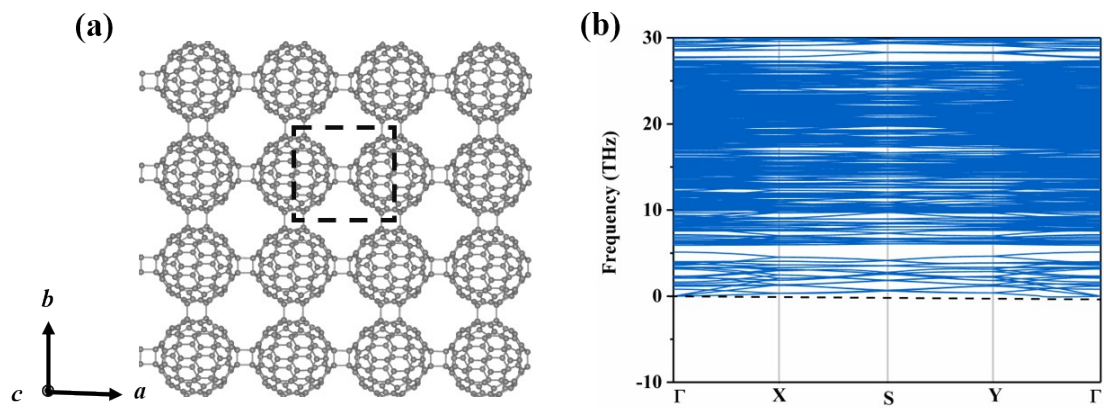

**Fig. S1** Crystal structure and phonon spectra of monolayer of  $\gamma$ -C<sub>80</sub>-2D.

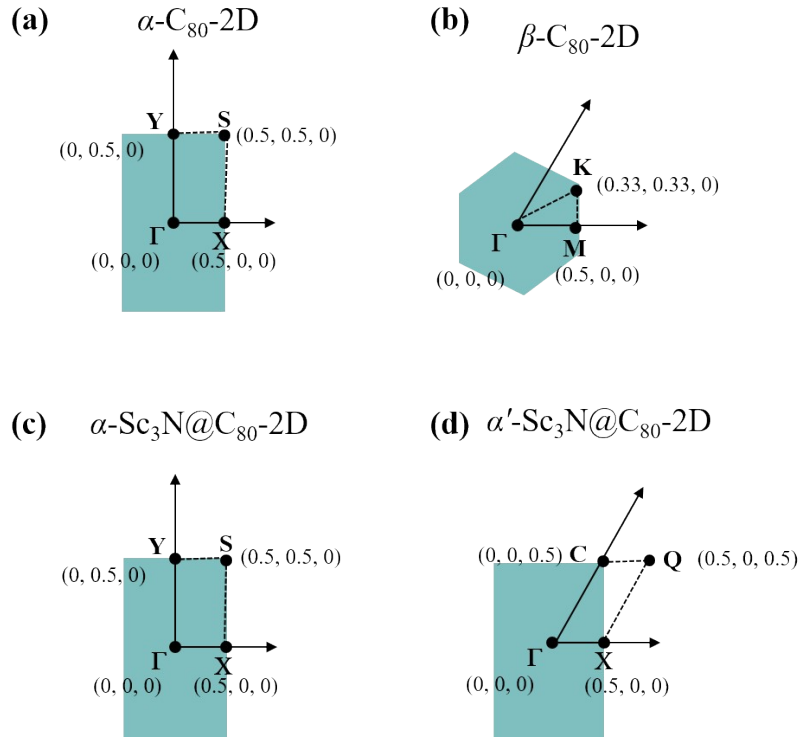

**Fig. S2** 2D rectangular Brillouin zones of (a)  $\alpha$ - $C_{80}$ -2D, (b)  $\beta$ - $C_{80}$ -2D, (c)  $\alpha$ - $Sc_3N@C_{80}$ -2D and (d)  $\alpha'$ - $Sc_3N@C_{80}$ -2D crystal lattices.

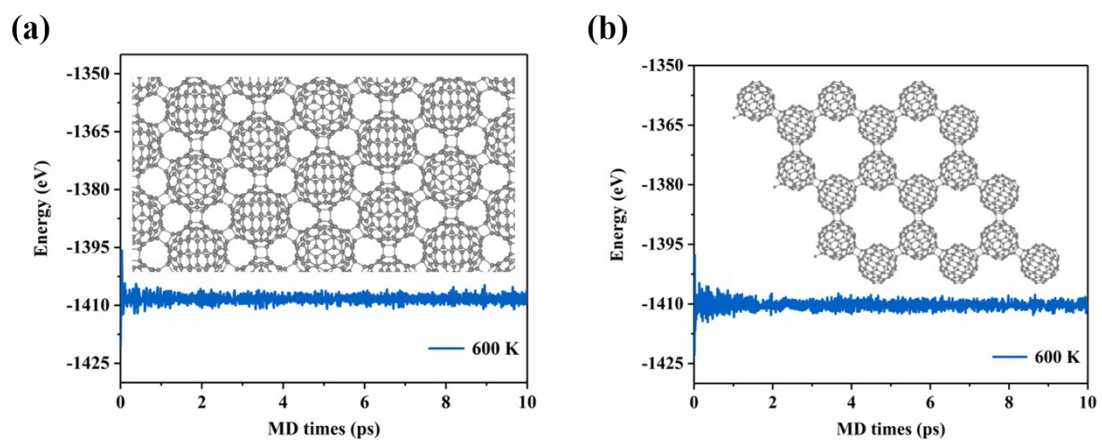

**Fig. S3** Energy profile during AIMD simulation at 600 K for (a)  $\alpha$ -C<sub>80</sub>-2D and (b)  $\beta$ -C<sub>80</sub>-2D.

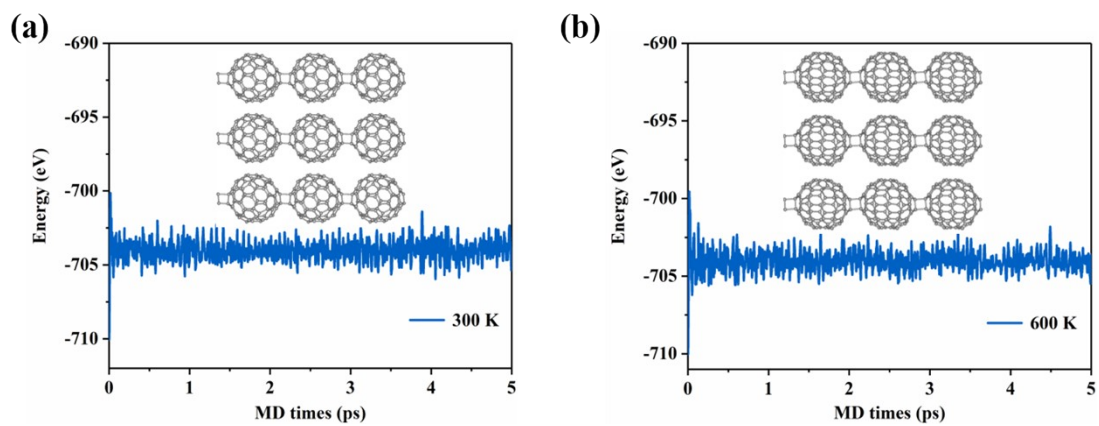

**Fig. S4** Energy profiles and snapshot structures at 5 ps for  $\gamma$ -C<sub>80</sub>-2D at (a) 300 K, (b) 600 K.

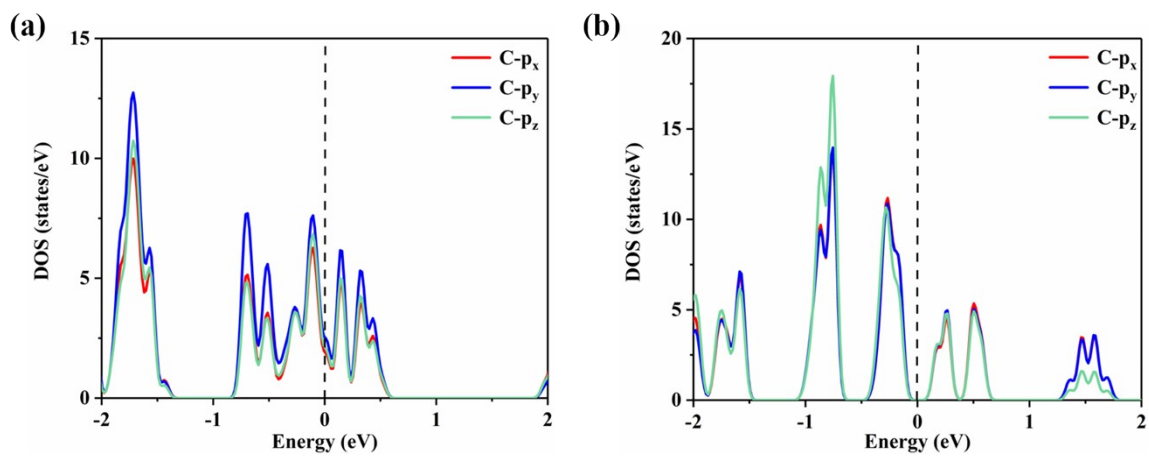

**Fig. S5** The  $p$ -orbital-resolved density of states for C atoms in (a)  $\alpha$ -C<sub>80</sub>-2D and (b)  $\beta$ -C<sub>80</sub>-2D.



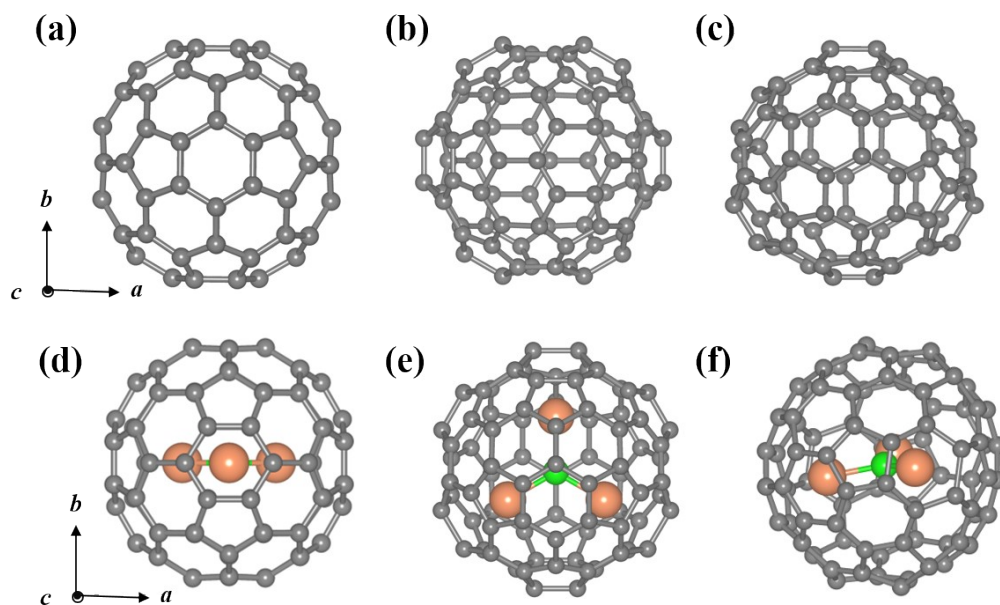

**Fig. S6** Freestanding cages of (a) C<sub>80</sub> and (d) Sc<sub>3</sub>N@C<sub>80</sub>. Deformed C<sub>80</sub> or Sc<sub>3</sub>N@C<sub>80</sub> cages directly taken from 2D monolayer structures of (b) α-C<sub>80</sub>, (c) β-C<sub>80</sub>, (e) α-Sc<sub>3</sub>N@C<sub>80</sub> and (f) α'-Sc<sub>3</sub>N@C<sub>80</sub>.

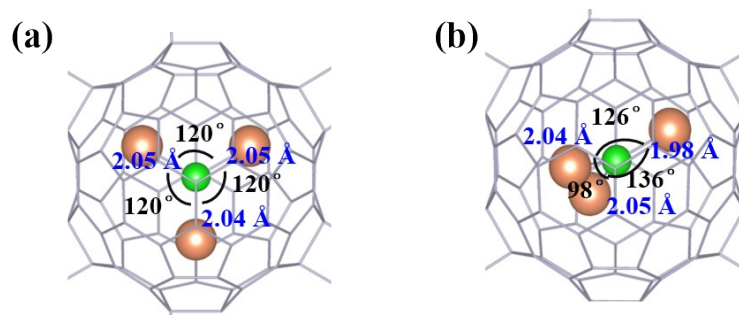

**Fig. S7** The Sc–N bond lengths (blue) and Sc–N–Sc angles (black) of (a)  $\alpha$ -Sc<sub>3</sub>N@C<sub>80</sub>-2D and (b)  $\alpha'$ -Sc<sub>3</sub>N@C<sub>80</sub>-2D.

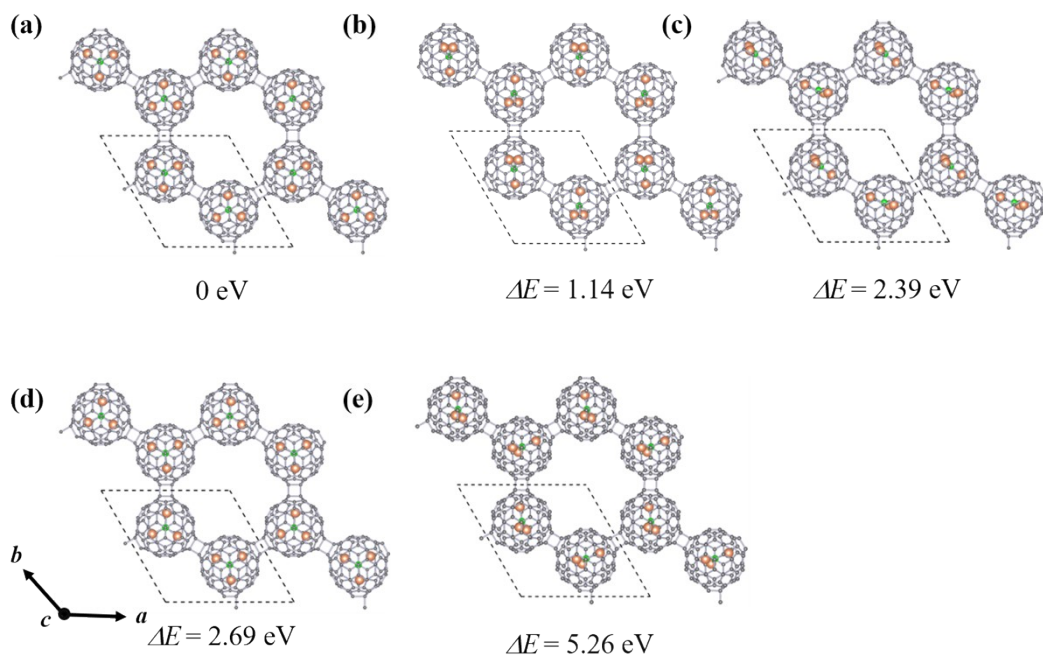

**Fig. S8** Typical low-lying isomers of  $\beta$ -Sc<sub>3</sub>N@C<sub>80</sub>-2D monolayers.

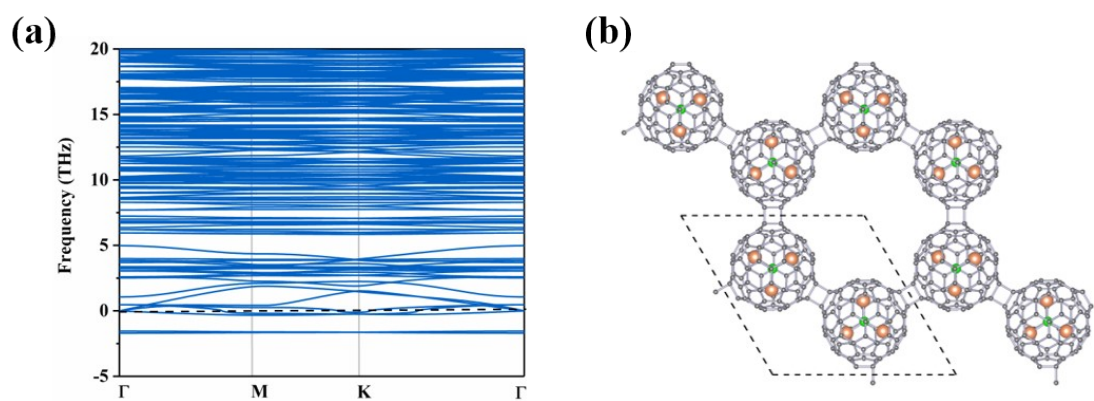

**Fig. S9** Crystal structure and phonon spectra of the lowest energy  $\beta$ -Sc<sub>3</sub>N@C<sub>80</sub>-2D monolayer.

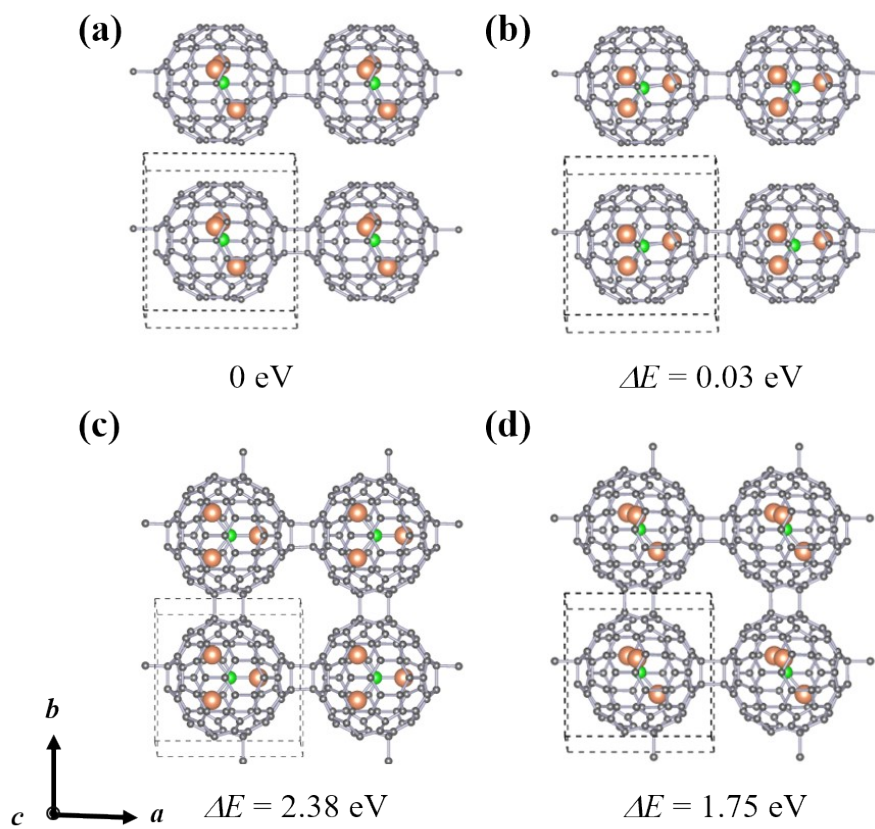

**Fig. S10** Typical low-lying isomers of  $\gamma$ -Sc<sub>3</sub>N@C<sub>80</sub>-2D monolayers.

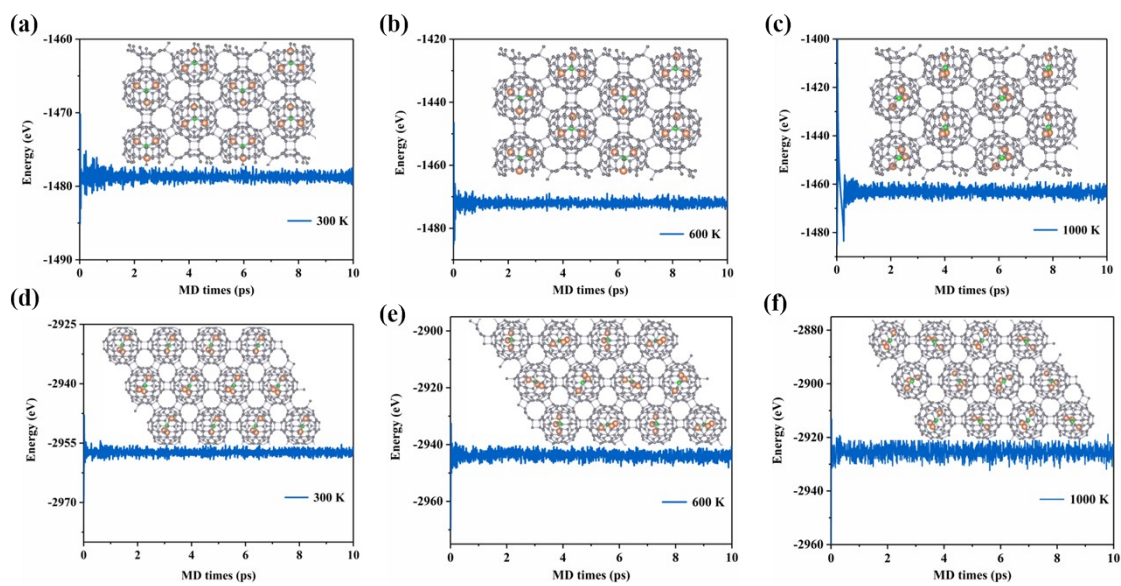

**Fig. S11** Energy profiles and snapshot structures at 10 ps for  $\alpha$ - $\text{Sc}_3\text{N}@C_{80}$ -2D system at (a) 300 K, (b) 600 K, and (c) 1000 K and for  $\alpha'$ - $\text{Sc}_3\text{N}@C_{80}$ -2D system at (d) 300 K, (e) 600 K, and (f) 1000 K.

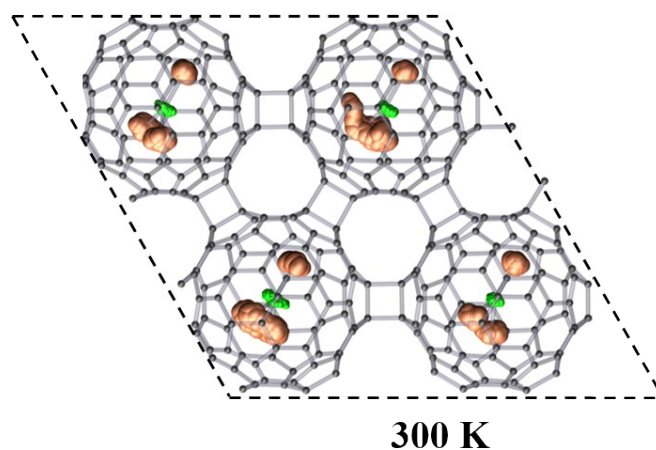

**Fig. S12** Schematic representation of disorder states for  $\alpha'$ -Sc<sub>3</sub>N@C<sub>80</sub>-2D crystal at 300K. The representative rotational operation of the Sc<sub>3</sub>N species for  $\alpha'$ -Sc<sub>3</sub>N@C<sub>80</sub>-2D phase are available in the movies.

**Table S1.** The Sc–N bond lengths ( $R_{\text{Sc-N}}$ ) of  $\text{Sc}_3\text{N}$  clusters and electronic energy-gap by using the PBE ( $E_g$ ) for  $\alpha\text{-Sc}_3\text{N}@C_{80}\text{-2D}$  material under different  $U_{\text{eff}}(\text{Sc})$  correction.

| $U_{\text{eff}}(\text{Sc})$   | <b>0</b> | <b>1</b> | <b>2</b> | <b>3</b> | <b>4</b> |
|-------------------------------|----------|----------|----------|----------|----------|
| $R_{\text{Sc-N}}(\text{\AA})$ | 2.05     | 2.05     | 2.05     | 2.05     | 2.05     |
| $E_g(\text{eV})$              | 0.08     | 0.13     | 0.13     | 0.13     | 0.13     |



**Table S2.** The deformation energy ( $E_{\text{d-atom}}$ ), and formation energy ( $E_{\text{f-atom}}$ ) defined with atom-wise energies of 2D monolayers.

| Monolayer                     | $E_{\text{d-atom}}$<br>(eV/atom) | $E_{\text{f-atom}}$<br>(eV/atom) |
|-------------------------------|----------------------------------|----------------------------------|
| qTP-C <sub>60</sub>           | 0.08                             | -6.95                            |
| qHP-C <sub>60</sub>           | 0.09                             | -6.95                            |
| $\alpha$ -C <sub>80</sub> -2D | 0.09                             | -7.01                            |
| $\beta$ -C <sub>80</sub> -2D  | 0.04                             | -6.99                            |
| $\gamma$ -C <sub>80</sub> -2D | 0.07                             | -6.98                            |

**Table S3.** Effective mass ( $m$ ), deformation potential constant ( $E_1$ ), elastic modulus ( $C$ ), carrier mobility ( $\mu$ ) for  $\beta$ -C<sub>80</sub>-2D,  $\alpha$ -Sc<sub>3</sub>N@C<sub>80</sub>-2D and  $\alpha'$ -Sc<sub>3</sub>N@C<sub>80</sub>-2D monolayers.

| Monolayer                                        | Direction | Carrier  | $m$<br>( $m_0$ ) | $E_1$<br>(eV) | $C$<br>(J m <sup>-2</sup> ) | $\mu$<br>(10 <sup>3</sup> cm <sup>2</sup> V <sup>-1</sup> s <sup>-1</sup> ) |
|--------------------------------------------------|-----------|----------|------------------|---------------|-----------------------------|-----------------------------------------------------------------------------|
| $\beta$ -C <sub>80</sub> -2D                     | $x$       | hole     | 0.42             | 2.66          | 91.54                       | 1.60                                                                        |
|                                                  |           | electron | 0.83             | 1.33          |                             | 1.84                                                                        |
|                                                  | $y$       | hole     | 0.39             | 1.61          | 65.76                       | 3.37                                                                        |
|                                                  |           | electron | 0.62             | 0.78          |                             | 5.57                                                                        |
| $\alpha$ -Sc <sub>3</sub> N@C <sub>80</sub> -2D  | $x$       | hole     | 1.33             | 3.07          | 190.50                      | 0.25                                                                        |
|                                                  |           | electron | 0.85             | 4.85          |                             | 0.25                                                                        |
|                                                  | $y$       | hole     | 1.28             | 6.06          | 197.39                      | 0.07                                                                        |
|                                                  |           | electron | 0.75             | 4.75          |                             | 0.31                                                                        |
| $\alpha'$ -Sc <sub>3</sub> N@C <sub>80</sub> -2D | $x$       | hole     | 1.10             | 6.01          | 187.70                      | 0.11                                                                        |
|                                                  |           | electron | 1.36             | 3.73          |                             | 0.17                                                                        |
|                                                  | $y$       | hole     | 0.80             | 8.92          | 191.20                      | 0.07                                                                        |
|                                                  |           | electron | 1.10             | 5.68          |                             | 0.09                                                                        |

## DFT optimized coordinates (Å) and lattice parameters of 2D monolayers

$\alpha$ -C<sub>80</sub>-2D monolayer with a = 17.76 Å, b = 10.25 Å, c = 34.97 Å,  $\alpha = 90^\circ$ ,  $\beta = 90^\circ$ ,  $\gamma = 90^\circ$

|   | x      | y      | z      |
|---|--------|--------|--------|
| C | 0.2663 | 0.6435 | 0.4898 |
| C | 0.7337 | 0.3565 | 0.5102 |
| C | 0.2337 | 0.1435 | 0.5102 |
| C | 0.7663 | 0.8565 | 0.4898 |
| C | 0.2337 | 0.8565 | 0.4898 |
| C | 0.7663 | 0.1435 | 0.5102 |
| C | 0.2663 | 0.3565 | 0.5102 |
| C | 0.7337 | 0.6435 | 0.4898 |
| C | 0.7155 | 0.5901 | 0.5294 |
| C | 0.2845 | 0.4099 | 0.4706 |
| C | 0.7845 | 0.0901 | 0.4706 |
| C | 0.2155 | 0.9099 | 0.5294 |
| C | 0.7845 | 0.9099 | 0.5294 |
| C | 0.2155 | 0.0901 | 0.4706 |
| C | 0.7155 | 0.4099 | 0.4706 |
| C | 0.2845 | 0.5901 | 0.5294 |
| C | 0.3284 | 0.6817 | 0.5499 |
| C | 0.6716 | 0.3183 | 0.4501 |
| C | 0.1716 | 0.1817 | 0.4501 |
| C | 0.8284 | 0.8183 | 0.5499 |
| C | 0.1716 | 0.8183 | 0.5499 |
| C | 0.8284 | 0.1817 | 0.4501 |
| C | 0.3284 | 0.3183 | 0.4501 |
| C | 0.6716 | 0.6817 | 0.5499 |
| C | 0.6888 | 0.7788 | 0.4881 |
| C | 0.3112 | 0.2212 | 0.5119 |
| C | 0.8112 | 0.2788 | 0.5119 |
| C | 0.1888 | 0.7212 | 0.4881 |
| C | 0.8112 | 0.7212 | 0.4881 |
| C | 0.1888 | 0.2788 | 0.5119 |
| C | 0.6888 | 0.2212 | 0.5119 |
| C | 0.3112 | 0.7788 | 0.4881 |
| C | 0.3674 | 0.7931 | 0.4561 |
| C | 0.6326 | 0.2069 | 0.5439 |
| C | 0.1326 | 0.2931 | 0.5439 |
| C | 0.8674 | 0.7069 | 0.4561 |
| C | 0.1326 | 0.7069 | 0.4561 |
| C | 0.8674 | 0.2931 | 0.5439 |
| C | 0.3674 | 0.2069 | 0.5439 |

|   |        |        |        |
|---|--------|--------|--------|
| C | 0.6326 | 0.7931 | 0.4561 |
| C | 0.6301 | 0.6465 | 0.5831 |
| C | 0.3699 | 0.3535 | 0.4169 |
| C | 0.8699 | 0.1465 | 0.4169 |
| C | 0.1301 | 0.8535 | 0.5831 |
| C | 0.8699 | 0.8535 | 0.5831 |
| C | 0.1301 | 0.1465 | 0.4169 |
| C | 0.6301 | 0.3535 | 0.4169 |
| C | 0.3699 | 0.6465 | 0.5831 |
| C | 0.3672 | 0.7023 | 0.4257 |
| C | 0.6328 | 0.2977 | 0.5743 |
| C | 0.1328 | 0.2023 | 0.5743 |
| C | 0.8672 | 0.7977 | 0.4257 |
| C | 0.1328 | 0.7977 | 0.4257 |
| C | 0.8672 | 0.2023 | 0.5743 |
| C | 0.3672 | 0.2977 | 0.5743 |
| C | 0.6328 | 0.7023 | 0.4257 |
| C | 0.6330 | 0.5142 | 0.5945 |
| C | 0.3670 | 0.4858 | 0.4055 |
| C | 0.8670 | 0.0142 | 0.4055 |
| C | 0.1330 | 0.9858 | 0.5945 |
| C | 0.8670 | 0.9858 | 0.5945 |
| C | 0.1330 | 0.0142 | 0.4055 |
| C | 0.6330 | 0.4858 | 0.4055 |
| C | 0.3670 | 0.5142 | 0.5945 |
| C | 0.4352 | 0.7197 | 0.5910 |
| C | 0.5648 | 0.2803 | 0.4090 |
| C | 0.0648 | 0.2197 | 0.4090 |
| C | 0.9352 | 0.7803 | 0.5910 |
| C | 0.0648 | 0.7803 | 0.5910 |
| C | 0.9352 | 0.2197 | 0.4090 |
| C | 0.4352 | 0.2803 | 0.4090 |
| C | 0.5648 | 0.7197 | 0.5910 |
| C | 0.5656 | 0.8601 | 0.4627 |
| C | 0.4344 | 0.1399 | 0.5373 |
| C | 0.9344 | 0.3601 | 0.5373 |
| C | 0.0656 | 0.6399 | 0.4627 |
| C | 0.9344 | 0.6399 | 0.4627 |
| C | 0.0656 | 0.3601 | 0.5373 |
| C | 0.5656 | 0.1399 | 0.5373 |
| C | 0.4344 | 0.8601 | 0.4627 |
| C | 0.4594 | 0.8193 | 0.5652 |
| C | 0.5406 | 0.1807 | 0.4348 |
| C | 0.0406 | 0.3193 | 0.4348 |

|   |        |        |        |
|---|--------|--------|--------|
| C | 0.9594 | 0.6807 | 0.5652 |
| C | 0.0406 | 0.6807 | 0.5652 |
| C | 0.9594 | 0.3193 | 0.4348 |
| C | 0.4594 | 0.1807 | 0.4348 |
| C | 0.5406 | 0.8193 | 0.5652 |
| C | 0.5445 | 0.9224 | 0.5000 |
| C | 0.4555 | 0.0776 | 0.5000 |
| C | 0.9555 | 0.4224 | 0.5000 |
| C | 0.0445 | 0.5776 | 0.5000 |
| C | 0.9555 | 0.5776 | 0.5000 |
| C | 0.0445 | 0.4224 | 0.5000 |
| C | 0.5445 | 0.0776 | 0.5000 |
| C | 0.4555 | 0.9224 | 0.5000 |
| C | 0.4317 | 0.6815 | 0.4022 |
| C | 0.5683 | 0.3185 | 0.5978 |
| C | 0.0683 | 0.1815 | 0.5978 |
| C | 0.9317 | 0.8185 | 0.4022 |
| C | 0.0683 | 0.8185 | 0.4022 |
| C | 0.9317 | 0.1815 | 0.5978 |
| C | 0.4317 | 0.3185 | 0.5978 |
| C | 0.5683 | 0.6815 | 0.4022 |
| C | 0.5682 | 0.4519 | 0.6104 |
| C | 0.4318 | 0.5481 | 0.3896 |
| C | 0.9318 | 0.9519 | 0.3896 |
| C | 0.0682 | 0.0481 | 0.6104 |
| C | 0.9318 | 0.0481 | 0.6104 |
| C | 0.0682 | 0.9519 | 0.3896 |
| C | 0.5682 | 0.5481 | 0.3896 |
| C | 0.4318 | 0.4519 | 0.6104 |
| C | 0.2854 | 0.5423 | 0.4604 |
| C | 0.7146 | 0.4577 | 0.5396 |
| C | 0.2146 | 0.0423 | 0.5396 |
| C | 0.7854 | 0.9577 | 0.4604 |
| C | 0.2146 | 0.9577 | 0.4604 |
| C | 0.7854 | 0.0423 | 0.5396 |
| C | 0.2854 | 0.4577 | 0.5396 |
| C | 0.7146 | 0.5423 | 0.4604 |
| C | 0.3268 | 0.5792 | 0.4278 |
| C | 0.6732 | 0.4208 | 0.5722 |
| C | 0.1732 | 0.0792 | 0.5722 |
| C | 0.8268 | 0.9208 | 0.4278 |
| C | 0.1732 | 0.9208 | 0.4278 |
| C | 0.8268 | 0.0792 | 0.5722 |
| C | 0.3268 | 0.4208 | 0.5722 |

|   |        |        |        |
|---|--------|--------|--------|
| C | 0.6732 | 0.5792 | 0.4278 |
| C | 0.3512 | 0.7861 | 0.5260 |
| C | 0.6488 | 0.2139 | 0.4740 |
| C | 0.1488 | 0.2861 | 0.4740 |
| C | 0.8512 | 0.7139 | 0.5260 |
| C | 0.1488 | 0.7139 | 0.5260 |
| C | 0.8512 | 0.2861 | 0.4740 |
| C | 0.3512 | 0.2139 | 0.4740 |
| C | 0.6488 | 0.7861 | 0.5260 |
| C | 0.4179 | 0.8530 | 0.5325 |
| C | 0.5821 | 0.1470 | 0.4675 |
| C | 0.0821 | 0.3530 | 0.4675 |
| C | 0.9179 | 0.6470 | 0.5325 |
| C | 0.0821 | 0.6470 | 0.5325 |
| C | 0.9179 | 0.3530 | 0.4675 |
| C | 0.4179 | 0.1470 | 0.4675 |
| C | 0.5821 | 0.8530 | 0.5325 |
| C | 0.5000 | 0.8356 | 0.4410 |
| C | 0.5000 | 0.1644 | 0.5590 |
| C | 0.0000 | 0.3356 | 0.5590 |
| C | 0.0000 | 0.6644 | 0.4410 |
| C | 0.5000 | 0.6575 | 0.6069 |
| C | 0.5000 | 0.3425 | 0.3931 |
| C | 0.0000 | 0.1575 | 0.3931 |
| C | 0.0000 | 0.8425 | 0.6069 |
| C | 0.5000 | 0.7458 | 0.4100 |
| C | 0.5000 | 0.2542 | 0.5900 |
| C | 0.0000 | 0.2458 | 0.5900 |
| C | 0.0000 | 0.7542 | 0.4100 |
| C | 0.5000 | 0.5215 | 0.6157 |
| C | 0.5000 | 0.4785 | 0.3843 |
| C | 0.0000 | 0.0215 | 0.3843 |
| C | 0.0000 | 0.9785 | 0.6157 |

$\beta$ -C<sub>80</sub>-2D network with a = 17.52 Å, b = 17.52 Å, c = 35.00 Å,  $\alpha = 90^\circ$ ,  $\beta = 90^\circ$ ,  $\gamma = 120^\circ$

|   | x      | y      | z      |
|---|--------|--------|--------|
| C | 0.3992 | 0.1592 | 0.4872 |
| C | 0.6008 | 0.8408 | 0.5128 |
| C | 0.8408 | 0.2400 | 0.4872 |
| C | 0.1592 | 0.7600 | 0.5128 |
| C | 0.7600 | 0.6008 | 0.4872 |
| C | 0.2400 | 0.3992 | 0.5128 |

|   |        |        |        |
|---|--------|--------|--------|
| C | 0.1592 | 0.3992 | 0.5128 |
| C | 0.8408 | 0.6008 | 0.4872 |
| C | 0.2400 | 0.8408 | 0.5128 |
| C | 0.7600 | 0.1592 | 0.4872 |
| C | 0.6008 | 0.7600 | 0.5128 |
| C | 0.3992 | 0.2400 | 0.4872 |
| C | 0.4185 | 0.1431 | 0.5256 |
| C | 0.5815 | 0.8569 | 0.4744 |
| C | 0.8569 | 0.2755 | 0.5256 |
| C | 0.1431 | 0.7245 | 0.4744 |
| C | 0.7245 | 0.5815 | 0.5256 |
| C | 0.2755 | 0.4185 | 0.4744 |
| C | 0.1431 | 0.4185 | 0.4744 |
| C | 0.8569 | 0.5815 | 0.5256 |
| C | 0.2755 | 0.8569 | 0.4744 |
| C | 0.7245 | 0.1431 | 0.5256 |
| C | 0.5815 | 0.7245 | 0.4744 |
| C | 0.4185 | 0.2755 | 0.5256 |
| C | 0.4335 | 0.2990 | 0.4555 |
| C | 0.5665 | 0.7010 | 0.5445 |
| C | 0.7010 | 0.1345 | 0.4555 |
| C | 0.2990 | 0.8655 | 0.5445 |
| C | 0.8655 | 0.5665 | 0.4555 |
| C | 0.1345 | 0.4335 | 0.5445 |
| C | 0.2990 | 0.4335 | 0.5445 |
| C | 0.7010 | 0.5665 | 0.4555 |
| C | 0.1345 | 0.7010 | 0.5445 |
| C | 0.8655 | 0.2990 | 0.4555 |
| C | 0.5665 | 0.8655 | 0.5445 |
| C | 0.4335 | 0.1345 | 0.4555 |
| C | 0.4598 | 0.2707 | 0.4224 |
| C | 0.5402 | 0.7293 | 0.5776 |
| C | 0.7293 | 0.1891 | 0.4224 |
| C | 0.2707 | 0.8109 | 0.5776 |
| C | 0.8109 | 0.5402 | 0.4224 |
| C | 0.1891 | 0.4598 | 0.5776 |
| C | 0.2707 | 0.4598 | 0.5776 |
| C | 0.7293 | 0.5402 | 0.4224 |
| C | 0.1891 | 0.7293 | 0.5776 |
| C | 0.8109 | 0.2707 | 0.4224 |
| C | 0.5402 | 0.8109 | 0.5776 |
| C | 0.4598 | 0.1891 | 0.4224 |
| C | 0.5321 | 0.3355 | 0.5891 |
| C | 0.4679 | 0.6645 | 0.4109 |

|   |        |        |        |
|---|--------|--------|--------|
| C | 0.6645 | 0.1966 | 0.5891 |
| C | 0.3355 | 0.8035 | 0.4109 |
| C | 0.8034 | 0.4679 | 0.5891 |
| C | 0.1966 | 0.5321 | 0.4109 |
| C | 0.3355 | 0.5321 | 0.4109 |
| C | 0.6645 | 0.4679 | 0.5891 |
| C | 0.1966 | 0.6645 | 0.4109 |
| C | 0.8034 | 0.3355 | 0.5891 |
| C | 0.4679 | 0.8035 | 0.4109 |
| C | 0.5321 | 0.1966 | 0.5891 |
| C | 0.3906 | 0.4770 | 0.5371 |
| C | 0.6094 | 0.5230 | 0.4629 |
| C | 0.5230 | 0.9136 | 0.5371 |
| C | 0.4770 | 0.0864 | 0.4629 |
| C | 0.0864 | 0.6094 | 0.5371 |
| C | 0.9136 | 0.3906 | 0.4629 |
| C | 0.4770 | 0.3906 | 0.4629 |
| C | 0.5230 | 0.6094 | 0.5371 |
| C | 0.9136 | 0.5230 | 0.4629 |
| C | 0.0864 | 0.4770 | 0.5371 |
| C | 0.6094 | 0.0864 | 0.4629 |
| C | 0.3906 | 0.9136 | 0.5371 |
| C | 0.5212 | 0.3958 | 0.5651 |
| C | 0.4788 | 0.6042 | 0.4349 |
| C | 0.6042 | 0.1253 | 0.5651 |
| C | 0.3958 | 0.8747 | 0.4349 |
| C | 0.8747 | 0.4788 | 0.5651 |
| C | 0.1253 | 0.5212 | 0.4349 |
| C | 0.3958 | 0.5212 | 0.4349 |
| C | 0.6042 | 0.4788 | 0.5651 |
| C | 0.1253 | 0.6042 | 0.4349 |
| C | 0.8747 | 0.3958 | 0.5651 |
| C | 0.4788 | 0.8747 | 0.4349 |
| C | 0.5212 | 0.1253 | 0.5651 |
| C | 0.4301 | 0.4794 | 0.5003 |
| C | 0.5699 | 0.5206 | 0.4997 |
| C | 0.5206 | 0.9507 | 0.5003 |
| C | 0.4794 | 0.0493 | 0.4997 |
| C | 0.0493 | 0.5699 | 0.5003 |
| C | 0.9507 | 0.4301 | 0.4997 |
| C | 0.4794 | 0.4301 | 0.4997 |
| C | 0.5206 | 0.5699 | 0.5003 |
| C | 0.9507 | 0.5206 | 0.4997 |
| C | 0.0493 | 0.4794 | 0.5003 |



|   |        |        |        |
|---|--------|--------|--------|
| C | 0.5699 | 0.0493 | 0.4997 |
| C | 0.4301 | 0.9507 | 0.5003 |
| C | 0.4655 | 0.3664 | 0.5331 |
| C | 0.5345 | 0.6336 | 0.4669 |
| C | 0.6336 | 0.0990 | 0.5331 |
| C | 0.3664 | 0.9010 | 0.4669 |
| C | 0.9010 | 0.5345 | 0.5331 |
| C | 0.0990 | 0.4655 | 0.4669 |
| C | 0.3664 | 0.4655 | 0.4669 |
| C | 0.6336 | 0.5345 | 0.5331 |
| C | 0.0990 | 0.6336 | 0.4669 |
| C | 0.9010 | 0.3664 | 0.5331 |
| C | 0.5345 | 0.9010 | 0.4669 |
| C | 0.4655 | 0.0990 | 0.5331 |
| C | 0.5301 | 0.3313 | 0.3984 |
| C | 0.4699 | 0.6687 | 0.6016 |
| C | 0.6687 | 0.1988 | 0.3984 |
| C | 0.3313 | 0.8012 | 0.6016 |
| C | 0.8012 | 0.4699 | 0.3984 |
| C | 0.1988 | 0.5301 | 0.6016 |
| C | 0.3313 | 0.5301 | 0.6016 |
| C | 0.6687 | 0.4699 | 0.3984 |
| C | 0.1988 | 0.6687 | 0.6016 |
| C | 0.8012 | 0.3313 | 0.3984 |
| C | 0.4699 | 0.8012 | 0.6016 |
| C | 0.5301 | 0.1988 | 0.3984 |
| C | 0.4297 | 0.2148 | 0.5490 |
| C | 0.5703 | 0.7852 | 0.4510 |
| C | 0.7852 | 0.2149 | 0.5490 |
| C | 0.2148 | 0.7851 | 0.4510 |
| C | 0.7851 | 0.5703 | 0.5490 |
| C | 0.2149 | 0.4297 | 0.4510 |
| C | 0.4883 | 0.2442 | 0.5806 |
| C | 0.5117 | 0.7558 | 0.4194 |
| C | 0.7558 | 0.2441 | 0.5806 |
| C | 0.2442 | 0.7559 | 0.4194 |
| C | 0.7559 | 0.5117 | 0.5806 |
| C | 0.2441 | 0.4883 | 0.4194 |
| C | 0.5740 | 0.2870 | 0.3835 |
| C | 0.4260 | 0.7130 | 0.6165 |
| C | 0.7130 | 0.2870 | 0.3835 |
| C | 0.2870 | 0.7130 | 0.6165 |
| C | 0.7130 | 0.4260 | 0.3835 |
| C | 0.2870 | 0.5740 | 0.6165 |

|   |        |        |        |
|---|--------|--------|--------|
| C | 0.5499 | 0.0999 | 0.4406 |
| C | 0.4501 | 0.9001 | 0.5594 |
| C | 0.9001 | 0.4501 | 0.4406 |
| C | 0.0999 | 0.5499 | 0.5594 |
| C | 0.5500 | 0.4501 | 0.4406 |
| C | 0.4501 | 0.5499 | 0.5594 |
| C | 0.5783 | 0.1565 | 0.4075 |
| C | 0.4217 | 0.8435 | 0.5925 |
| C | 0.8435 | 0.4217 | 0.4075 |
| C | 0.1565 | 0.5783 | 0.5925 |
| C | 0.5783 | 0.4217 | 0.4075 |
| C | 0.4217 | 0.5783 | 0.5925 |
| C | 0.6204 | 0.2407 | 0.6036 |
| C | 0.3796 | 0.7593 | 0.3964 |
| C | 0.7593 | 0.3796 | 0.6036 |
| C | 0.2407 | 0.6204 | 0.3964 |
| C | 0.6204 | 0.3796 | 0.6036 |
| C | 0.3796 | 0.6204 | 0.3964 |
| C | 0.3333 | 0.6667 | 0.6228 |
| C | 0.6667 | 0.3333 | 0.3772 |
| C | 0.3333 | 0.6667 | 0.3899 |
| C | 0.6667 | 0.3333 | 0.6101 |

$\gamma$ -C<sub>80</sub>-2D network with  $a = 10.19 \text{ \AA}$ ,  $b = 9.90 \text{ \AA}$ ,  $c = 34.97 \text{ \AA}$ ,  $\alpha = 87.85^\circ$ ,  $\beta = 90.37^\circ$ ,  $\gamma = 90.06^\circ$

|   |        |        |        |
|---|--------|--------|--------|
| C | 0.3061 | 0.1692 | 0.5642 |
| C | 0.5198 | 0.7536 | 0.3841 |
| C | 0.4018 | 0.0816 | 0.5379 |
| C | 0.4582 | 0.6391 | 0.3660 |
| C | 0.2130 | 0.7395 | 0.4474 |
| C | 0.1738 | 0.4168 | 0.5790 |
| C | 0.1387 | 0.6216 | 0.4546 |
| C | 0.7528 | 0.8100 | 0.5134 |
| C | 0.3011 | 0.2737 | 0.4094 |
| C | 0.6335 | 0.8774 | 0.5113 |
| C | 0.3218 | 0.3909 | 0.3812 |
| C | 0.6543 | 0.2705 | 0.3978 |
| C | 0.9217 | 0.5804 | 0.5001 |
| C | 0.7251 | 0.3939 | 0.3902 |
| C | 0.6932 | 0.1838 | 0.4356 |
| C | 0.4807 | 0.7275 | 0.6160 |
| C | 0.5975 | 0.0902 | 0.4619 |
| C | 0.5421 | 0.6090 | 0.6341 |

|   |        |        |        |
|---|--------|--------|--------|
| C | 0.7875 | 0.7280 | 0.5528 |
| C | 0.8260 | 0.4348 | 0.4209 |
| C | 0.8615 | 0.6117 | 0.5454 |
| C | 0.2479 | 0.8126 | 0.4868 |
| C | 0.6984 | 0.2536 | 0.5905 |
| C | 0.3674 | 0.8793 | 0.4889 |
| C | 0.6779 | 0.3643 | 0.6187 |
| C | 0.3452 | 0.2474 | 0.6021 |
| C | 0.0786 | 0.5802 | 0.5000 |
| C | 0.2748 | 0.3690 | 0.6097 |
| C | 0.4234 | 0.8184 | 0.4124 |
| C | 0.4578 | 0.1313 | 0.4525 |
| C | 0.4228 | 0.2012 | 0.4122 |
| C | 0.4586 | 0.8788 | 0.4527 |
| C | 0.2117 | 0.2245 | 0.5330 |
| C | 0.1432 | 0.3464 | 0.5399 |
| C | 0.7878 | 0.2322 | 0.4668 |
| C | 0.8565 | 0.3556 | 0.4600 |
| C | 0.5281 | 0.5157 | 0.3600 |
| C | 0.6627 | 0.5145 | 0.3714 |
| C | 0.2559 | 0.5122 | 0.3906 |
| C | 0.1622 | 0.5080 | 0.4278 |
| C | 0.6939 | 0.8308 | 0.4358 |
| C | 0.4802 | 0.2464 | 0.6159 |
| C | 0.5982 | 0.9184 | 0.4621 |
| C | 0.5418 | 0.3609 | 0.6340 |
| C | 0.7870 | 0.2605 | 0.5526 |
| C | 0.8262 | 0.5832 | 0.4210 |
| C | 0.8613 | 0.3784 | 0.5454 |
| C | 0.2472 | 0.1900 | 0.4866 |
| C | 0.6989 | 0.7263 | 0.5906 |
| C | 0.3665 | 0.1226 | 0.4887 |
| C | 0.6782 | 0.6091 | 0.6188 |
| C | 0.3457 | 0.7295 | 0.6022 |
| C | 0.0783 | 0.4196 | 0.4999 |
| C | 0.2749 | 0.6061 | 0.6098 |
| C | 0.3068 | 0.8162 | 0.5644 |
| C | 0.5193 | 0.2725 | 0.3840 |
| C | 0.4025 | 0.9098 | 0.5381 |
| C | 0.4579 | 0.3910 | 0.3659 |
| C | 0.2125 | 0.2720 | 0.4472 |
| C | 0.1740 | 0.5652 | 0.5791 |
| C | 0.1385 | 0.3883 | 0.4546 |
| C | 0.7521 | 0.1874 | 0.5132 |

|   |        |        |        |
|---|--------|--------|--------|
| C | 0.3016 | 0.7464 | 0.4095 |
| C | 0.6326 | 0.1207 | 0.5111 |
| C | 0.3221 | 0.6356 | 0.3812 |
| C | 0.6548 | 0.7526 | 0.3979 |
| C | 0.9215 | 0.4198 | 0.5000 |
| C | 0.7252 | 0.6310 | 0.3902 |
| C | 0.5766 | 0.1817 | 0.5876 |
| C | 0.5423 | 0.8687 | 0.5475 |
| C | 0.5772 | 0.7988 | 0.5878 |
| C | 0.5414 | 0.1212 | 0.5473 |
| C | 0.7883 | 0.7755 | 0.4670 |
| C | 0.8568 | 0.6536 | 0.4601 |
| C | 0.2122 | 0.7678 | 0.5332 |
| C | 0.1435 | 0.6444 | 0.5400 |
| C | 0.4719 | 0.4843 | 0.6400 |
| C | 0.3373 | 0.4855 | 0.6286 |
| C | 0.7441 | 0.4878 | 0.6094 |
| C | 0.8378 | 0.4920 | 0.5722 |

$\alpha$ -Sc<sub>3</sub>N@C<sub>80</sub>-2D network with a = 17.88 Å, b = 10.31 Å, c = 34.97 Å,  $\alpha = 90^\circ$ ,  $\beta = 90^\circ$ ,  $\gamma = 90^\circ$

|   | x      | y      | z      |
|---|--------|--------|--------|
| C | 0.0150 | 0.3914 | 0.5096 |
| C | 0.4649 | 0.3370 | 0.4707 |
| C | 0.0790 | 0.4286 | 0.4499 |
| C | 0.4383 | 0.5283 | 0.5113 |
| C | 0.1169 | 0.5435 | 0.5434 |
| C | 0.3798 | 0.3935 | 0.4166 |
| C | 0.1164 | 0.4494 | 0.5737 |
| C | 0.3827 | 0.2617 | 0.4054 |
| C | 0.1856 | 0.4665 | 0.4087 |
| C | 0.3152 | 0.6081 | 0.5367 |
| C | 0.2098 | 0.5690 | 0.4336 |
| C | 0.2941 | 0.6691 | 0.4993 |
| C | 0.1823 | 0.4281 | 0.5969 |
| C | 0.3183 | 0.2001 | 0.3894 |
| C | 0.0326 | 0.2906 | 0.5390 |
| C | 0.0762 | 0.3288 | 0.5717 |
| C | 0.1028 | 0.5321 | 0.4740 |
| C | 0.1693 | 0.5997 | 0.4670 |
| C | 0.9836 | 0.8947 | 0.4894 |
| C | 0.5349 | 0.8412 | 0.5285 |
| C | 0.9228 | 0.9333 | 0.5495 |

|   |        |        |        |
|---|--------|--------|--------|
| C | 0.5610 | 0.0281 | 0.4878 |
| C | 0.8832 | 0.0420 | 0.4560 |
| C | 0.6196 | 0.8974 | 0.5828 |
| C | 0.8840 | 0.9532 | 0.4253 |
| C | 0.6177 | 0.7658 | 0.5936 |
| C | 0.8146 | 0.9688 | 0.5902 |
| C | 0.6838 | 0.1103 | 0.4629 |
| C | 0.7901 | 0.0713 | 0.5649 |
| C | 0.7036 | 0.1774 | 0.4997 |
| C | 0.8184 | 0.9313 | 0.4024 |
| C | 0.6821 | 0.7038 | 0.6095 |
| C | 0.9644 | 0.7948 | 0.4602 |
| C | 0.9243 | 0.8317 | 0.4273 |
| C | 0.8988 | 0.0353 | 0.5253 |
| C | 0.8341 | 0.1083 | 0.5323 |
| C | 0.9850 | 0.6087 | 0.5096 |
| C | 0.5351 | 0.6630 | 0.4707 |
| C | 0.9209 | 0.5715 | 0.4499 |
| C | 0.5617 | 0.4716 | 0.5113 |
| C | 0.8831 | 0.4566 | 0.5434 |
| C | 0.6202 | 0.6064 | 0.4166 |
| C | 0.8836 | 0.5506 | 0.5737 |
| C | 0.6173 | 0.7383 | 0.4054 |
| C | 0.8144 | 0.5335 | 0.4087 |
| C | 0.6848 | 0.3919 | 0.5367 |
| C | 0.7903 | 0.4310 | 0.4336 |
| C | 0.7059 | 0.3309 | 0.4993 |
| C | 0.8177 | 0.5719 | 0.5969 |
| C | 0.6817 | 0.7998 | 0.3894 |
| C | 0.9674 | 0.7095 | 0.5391 |
| C | 0.9238 | 0.6713 | 0.5717 |
| C | 0.8972 | 0.4679 | 0.4740 |
| C | 0.8308 | 0.4003 | 0.4670 |
| C | 0.0164 | 0.1054 | 0.4894 |
| C | 0.4651 | 0.1588 | 0.5285 |
| C | 0.0772 | 0.0667 | 0.5495 |
| C | 0.4390 | 0.9718 | 0.4878 |
| C | 0.1168 | 0.9580 | 0.4560 |
| C | 0.3804 | 0.1026 | 0.5828 |
| C | 0.1160 | 0.0468 | 0.4253 |
| C | 0.3823 | 0.2342 | 0.5936 |
| C | 0.1853 | 0.0312 | 0.5902 |
| C | 0.3162 | 0.8897 | 0.4629 |
| C | 0.2099 | 0.9287 | 0.5649 |

|   |        |        |        |
|---|--------|--------|--------|
| C | 0.2964 | 0.8226 | 0.4997 |
| C | 0.1816 | 0.0687 | 0.4024 |
| C | 0.3179 | 0.2962 | 0.6095 |
| C | 0.0356 | 0.2053 | 0.4602 |
| C | 0.0757 | 0.1683 | 0.4273 |
| C | 0.1012 | 0.9647 | 0.5253 |
| C | 0.1659 | 0.8917 | 0.5323 |
| C | 0.5150 | 0.6086 | 0.5096 |
| C | 0.9649 | 0.6630 | 0.4708 |
| C | 0.5791 | 0.5714 | 0.4499 |
| C | 0.9383 | 0.4716 | 0.5113 |
| C | 0.6169 | 0.4566 | 0.5434 |
| C | 0.8798 | 0.6065 | 0.4167 |
| C | 0.6163 | 0.5506 | 0.5737 |
| C | 0.8827 | 0.7383 | 0.4054 |
| C | 0.6856 | 0.5335 | 0.4087 |
| C | 0.8152 | 0.3919 | 0.5367 |
| C | 0.7098 | 0.4310 | 0.4336 |
| C | 0.7941 | 0.3309 | 0.4993 |
| C | 0.6822 | 0.5719 | 0.5969 |
| C | 0.8183 | 0.7998 | 0.3894 |
| C | 0.5326 | 0.7094 | 0.5390 |
| C | 0.5762 | 0.6712 | 0.5716 |
| C | 0.6028 | 0.4679 | 0.4740 |
| C | 0.6693 | 0.4003 | 0.4670 |
| C | 0.4836 | 0.1053 | 0.4894 |
| C | 0.0349 | 0.1588 | 0.5285 |
| C | 0.4228 | 0.0667 | 0.5495 |
| C | 0.0610 | 0.9719 | 0.4878 |
| C | 0.3832 | 0.9580 | 0.4560 |
| C | 0.1196 | 0.1026 | 0.5828 |
| C | 0.3840 | 0.0468 | 0.4253 |
| C | 0.1177 | 0.2343 | 0.5936 |
| C | 0.3147 | 0.0312 | 0.5902 |
| C | 0.1838 | 0.8897 | 0.4629 |
| C | 0.2901 | 0.9287 | 0.5649 |
| C | 0.2036 | 0.8226 | 0.4997 |
| C | 0.3184 | 0.0687 | 0.4024 |
| C | 0.1821 | 0.2962 | 0.6095 |
| C | 0.4644 | 0.2052 | 0.4601 |
| C | 0.4243 | 0.1683 | 0.4272 |
| C | 0.3988 | 0.9647 | 0.5253 |
| C | 0.3341 | 0.8917 | 0.5323 |
| C | 0.4850 | 0.3914 | 0.5096 |

|   |        |        |        |
|---|--------|--------|--------|
| C | 0.0351 | 0.3370 | 0.4707 |
| C | 0.4210 | 0.4285 | 0.4499 |
| C | 0.0617 | 0.5284 | 0.5113 |
| C | 0.3831 | 0.5434 | 0.5434 |
| C | 0.1202 | 0.3935 | 0.4166 |
| C | 0.3837 | 0.4494 | 0.5737 |
| C | 0.1173 | 0.2617 | 0.4054 |
| C | 0.3144 | 0.4665 | 0.4087 |
| C | 0.1849 | 0.6081 | 0.5367 |
| C | 0.2903 | 0.5690 | 0.4336 |
| C | 0.2059 | 0.6691 | 0.4993 |
| C | 0.3178 | 0.4281 | 0.5969 |
| C | 0.1817 | 0.2002 | 0.3894 |
| C | 0.4674 | 0.2905 | 0.5390 |
| C | 0.4238 | 0.3287 | 0.5716 |
| C | 0.3972 | 0.5320 | 0.4740 |
| C | 0.3308 | 0.5997 | 0.4670 |
| C | 0.5164 | 0.8946 | 0.4894 |
| C | 0.9651 | 0.8413 | 0.5285 |
| C | 0.5772 | 0.9333 | 0.5495 |
| C | 0.9390 | 0.0282 | 0.4878 |
| C | 0.6168 | 0.0420 | 0.4560 |
| C | 0.8803 | 0.8974 | 0.5828 |
| C | 0.6160 | 0.9532 | 0.4253 |
| C | 0.8823 | 0.7658 | 0.5937 |
| C | 0.6853 | 0.9688 | 0.5902 |
| C | 0.8162 | 0.1103 | 0.4629 |
| C | 0.7098 | 0.0713 | 0.5649 |
| C | 0.7964 | 0.1774 | 0.4997 |
| C | 0.6816 | 0.9313 | 0.4024 |
| C | 0.8179 | 0.7038 | 0.6095 |
| C | 0.5356 | 0.7947 | 0.4602 |
| C | 0.5757 | 0.8317 | 0.4273 |
| C | 0.6012 | 0.0353 | 0.5253 |
| C | 0.6659 | 0.1083 | 0.5323 |
| C | 0.7500 | 0.0852 | 0.4412 |
| C | 0.7500 | 0.9076 | 0.6061 |
| C | 0.7500 | 0.9955 | 0.4103 |
| C | 0.7500 | 0.7731 | 0.6149 |
| C | 0.2500 | 0.9148 | 0.4412 |
| C | 0.2500 | 0.0924 | 0.6061 |
| C | 0.2500 | 0.0045 | 0.4103 |
| C | 0.2500 | 0.2269 | 0.6149 |
| C | 0.2500 | 0.5871 | 0.5591 |

|    |        |        |        |
|----|--------|--------|--------|
| C  | 0.2500 | 0.4048 | 0.3926 |
| C  | 0.2500 | 0.4941 | 0.5897 |
| C  | 0.2500 | 0.2695 | 0.3844 |
| C  | 0.7500 | 0.4129 | 0.5591 |
| C  | 0.7500 | 0.5952 | 0.3926 |
| C  | 0.7500 | 0.5059 | 0.5897 |
| C  | 0.7500 | 0.7305 | 0.3844 |
| Sc | 0.1512 | 0.3444 | 0.5125 |
| Sc | 0.8488 | 0.6556 | 0.5125 |
| Sc | 0.6511 | 0.6557 | 0.5125 |
| Sc | 0.3489 | 0.3443 | 0.5125 |
| Sc | 0.7500 | 0.9526 | 0.5070 |
| Sc | 0.2500 | 0.0474 | 0.5069 |
| N  | 0.2500 | 0.2454 | 0.5082 |
| N  | 0.7500 | 0.7546 | 0.5082 |

$\alpha'$ -Sc<sub>3</sub>N@C<sub>80</sub>-2D network with a =17.76 Å, b = 30.55 Å, c = 20.50 Å,  $\alpha = 90^\circ$ ,  $\beta = 150^\circ$ ,  $\gamma = 90^\circ$

|   | x      | y      | z      |
|---|--------|--------|--------|
| C | 0.6209 | 0.4870 | 0.2639 |
| C | 0.6209 | 0.5130 | 0.7639 |
| C | 0.9108 | 0.5099 | 0.2664 |
| C | 0.9108 | 0.4901 | 0.7664 |
| C | 0.1244 | 0.5354 | 0.7153 |
| C | 0.1244 | 0.4646 | 0.2153 |
| C | 0.3051 | 0.4674 | 0.7166 |
| C | 0.3051 | 0.5326 | 0.2166 |
| C | 0.6451 | 0.5558 | 0.3268 |
| C | 0.6451 | 0.4442 | 0.8268 |
| C | 0.0111 | 0.4414 | 0.3291 |
| C | 0.0111 | 0.5585 | 0.8291 |
| C | 0.9102 | 0.4886 | 0.6892 |
| C | 0.9103 | 0.5114 | 0.1892 |
| C | 0.4592 | 0.5143 | 0.6862 |
| C | 0.4592 | 0.4857 | 0.1862 |
| C | 0.5707 | 0.4491 | 0.3671 |
| C | 0.5707 | 0.5509 | 0.8671 |
| C | 0.1591 | 0.5494 | 0.3651 |
| C | 0.1591 | 0.4506 | 0.8651 |
| C | 0.9802 | 0.5962 | 0.6282 |
| C | 0.9802 | 0.4038 | 0.1282 |
| C | 0.2876 | 0.4022 | 0.6372 |
| C | 0.2876 | 0.5978 | 0.1372 |
| C | 0.6648 | 0.4144 | 0.3676 |



|   |        |        |        |
|---|--------|--------|--------|
| C | 0.6648 | 0.5856 | 0.8676 |
| C | 0.0663 | 0.5848 | 0.3630 |
| C | 0.0663 | 0.4152 | 0.8630 |
| C | 0.1153 | 0.6084 | 0.6288 |
| C | 0.1153 | 0.3916 | 0.1288 |
| C | 0.1557 | 0.3887 | 0.6412 |
| C | 0.1557 | 0.6113 | 0.1412 |
| C | 0.7126 | 0.6039 | 0.4326 |
| C | 0.7126 | 0.3961 | 0.9326 |
| C | 0.1575 | 0.3948 | 0.4370 |
| C | 0.1575 | 0.6052 | 0.9370 |
| C | 0.7062 | 0.4583 | 0.5679 |
| C | 0.7062 | 0.5417 | 0.0679 |
| C | 0.4208 | 0.5428 | 0.5641 |
| C | 0.4208 | 0.4572 | 0.0641 |
| C | 0.6355 | 0.5754 | 0.4581 |
| C | 0.6355 | 0.4246 | 0.9581 |
| C | 0.2829 | 0.4240 | 0.4611 |
| C | 0.2829 | 0.5760 | 0.9611 |
| C | 0.6212 | 0.5009 | 0.5456 |
| C | 0.6212 | 0.4990 | 0.0456 |
| C | 0.4642 | 0.5001 | 0.5442 |
| C | 0.4642 | 0.4999 | 0.0442 |
| C | 0.7524 | 0.3878 | 0.4338 |
| C | 0.7524 | 0.6122 | 0.9338 |
| C | 0.1092 | 0.6117 | 0.4279 |
| C | 0.1092 | 0.3883 | 0.9279 |
| C | 0.1150 | 0.6279 | 0.5650 |
| C | 0.1150 | 0.3721 | 0.0650 |
| C | 0.0257 | 0.3739 | 0.5723 |
| C | 0.0257 | 0.6261 | 0.0723 |
| C | 0.7400 | 0.4533 | 0.2825 |
| C | 0.7400 | 0.5467 | 0.7825 |
| C | 0.8284 | 0.5435 | 0.2843 |
| C | 0.8284 | 0.4565 | 0.7843 |
| C | 0.7462 | 0.4163 | 0.3268 |
| C | 0.7462 | 0.5837 | 0.8268 |
| C | 0.9043 | 0.5819 | 0.3229 |
| C | 0.9043 | 0.4181 | 0.8229 |
| C | 0.5649 | 0.5285 | 0.3511 |
| C | 0.5649 | 0.4715 | 0.8511 |
| C | 0.1388 | 0.4689 | 0.3521 |
| C | 0.1388 | 0.5311 | 0.8521 |
| C | 0.5640 | 0.5370 | 0.4180 |

|   |        |        |        |
|---|--------|--------|--------|
| C | 0.5640 | 0.4630 | 0.9180 |
| C | 0.2726 | 0.4618 | 0.4181 |
| C | 0.2726 | 0.5382 | 0.9181 |
| C | 0.0896 | 0.5096 | 0.2333 |
| C | 0.0896 | 0.4904 | 0.7333 |
| C | 0.3728 | 0.4874 | 0.2311 |
| C | 0.3728 | 0.5126 | 0.7311 |
| C | 0.6948 | 0.4683 | 0.7836 |
| C | 0.6948 | 0.5317 | 0.2836 |
| C | 0.8760 | 0.5347 | 0.7859 |
| C | 0.8760 | 0.4653 | 0.2859 |
| C | 0.9880 | 0.4408 | 0.1715 |
| C | 0.9880 | 0.5592 | 0.6715 |
| C | 0.3593 | 0.5583 | 0.1755 |
| C | 0.3593 | 0.4417 | 0.6755 |
| C | 0.5293 | 0.5146 | 0.8110 |
| C | 0.5293 | 0.4854 | 0.3110 |
| C | 0.0903 | 0.4881 | 0.8118 |
| C | 0.0903 | 0.5119 | 0.3118 |
| C | 0.8407 | 0.5482 | 0.1340 |
| C | 0.8407 | 0.4518 | 0.6340 |
| C | 0.4196 | 0.4493 | 0.1308 |
| C | 0.4196 | 0.5507 | 0.6308 |
| C | 0.7212 | 0.4056 | 0.8676 |
| C | 0.7212 | 0.5944 | 0.3677 |
| C | 0.0182 | 0.5963 | 0.8716 |
| C | 0.0182 | 0.4037 | 0.3716 |
| C | 0.9361 | 0.5828 | 0.1349 |
| C | 0.9361 | 0.4172 | 0.6349 |
| C | 0.3403 | 0.4109 | 0.1338 |
| C | 0.3403 | 0.5891 | 0.6338 |
| C | 0.8493 | 0.3924 | 0.8632 |
| C | 0.8493 | 0.6076 | 0.3632 |
| C | 0.8830 | 0.6089 | 0.8694 |
| C | 0.8830 | 0.3911 | 0.3694 |
| C | 0.8409 | 0.3950 | 0.0620 |
| C | 0.8409 | 0.6050 | 0.5620 |
| C | 0.2850 | 0.6042 | 0.0671 |
| C | 0.2850 | 0.3958 | 0.5671 |
| C | 0.5757 | 0.5423 | 0.9362 |
| C | 0.5757 | 0.4577 | 0.4362 |
| C | 0.2931 | 0.4577 | 0.9325 |
| C | 0.2931 | 0.5423 | 0.4325 |
| C | 0.7153 | 0.4237 | 0.0387 |

|   |        |        |        |
|---|--------|--------|--------|
| C | 0.7153 | 0.5763 | 0.5387 |
| C | 0.3619 | 0.5753 | 0.0411 |
| C | 0.3619 | 0.4247 | 0.5411 |
| C | 0.5327 | 0.4997 | 0.9566 |
| C | 0.5327 | 0.5003 | 0.4566 |
| C | 0.3771 | 0.5004 | 0.9553 |
| C | 0.3771 | 0.4996 | 0.4553 |
| C | 0.8926 | 0.6095 | 0.0700 |
| C | 0.8926 | 0.3905 | 0.5700 |
| C | 0.2542 | 0.3834 | 0.0670 |
| C | 0.2542 | 0.6166 | 0.5670 |
| C | 0.9749 | 0.3733 | 0.9273 |
| C | 0.9749 | 0.6267 | 0.4273 |
| C | 0.8850 | 0.6273 | 0.9340 |
| C | 0.8850 | 0.3727 | 0.4340 |
| C | 0.1742 | 0.5441 | 0.2175 |
| C | 0.1742 | 0.4559 | 0.7175 |
| C | 0.2526 | 0.4544 | 0.2106 |
| C | 0.2526 | 0.5457 | 0.7106 |
| C | 0.0987 | 0.5838 | 0.1799 |
| C | 0.0987 | 0.4162 | 0.6799 |
| C | 0.2513 | 0.4160 | 0.1703 |
| C | 0.2513 | 0.5841 | 0.6703 |
| C | 0.8604 | 0.4684 | 0.1483 |
| C | 0.8604 | 0.5316 | 0.6483 |
| C | 0.4289 | 0.5291 | 0.1471 |
| C | 0.4289 | 0.4709 | 0.6471 |
| C | 0.7260 | 0.4613 | 0.0819 |
| C | 0.7260 | 0.5387 | 0.5819 |
| C | 0.4342 | 0.5371 | 0.0819 |
| C | 0.4342 | 0.4629 | 0.5819 |
| C | 0.6646 | 0.5671 | 0.0015 |
| C | 0.6647 | 0.4329 | 0.5015 |
| C | 0.3350 | 0.4318 | 0.9984 |
| C | 0.3350 | 0.5682 | 0.4984 |
| C | 0.8392 | 0.3769 | 0.9973 |
| C | 0.8391 | 0.6231 | 0.4973 |
| C | 0.1586 | 0.6230 | 0.0015 |
| C | 0.1586 | 0.3770 | 0.5015 |
| C | 0.7556 | 0.6021 | 0.0014 |
| C | 0.7557 | 0.3979 | 0.5014 |
| C | 0.2468 | 0.3950 | 0.9976 |
| C | 0.2468 | 0.6050 | 0.4976 |
| C | 0.9738 | 0.3673 | 0.9962 |

|    |        |        |        |
|----|--------|--------|--------|
| C  | 0.9738 | 0.6327 | 0.4962 |
| C  | 0.0233 | 0.6330 | 0.0015 |
| C  | 0.0233 | 0.3670 | 0.5015 |
| Sc | 0.1005 | 0.4549 | 0.5819 |
| Sc | 0.1005 | 0.5451 | 0.0819 |
| Sc | 0.1418 | 0.5502 | 0.5443 |
| Sc | 0.1418 | 0.4498 | 0.0443 |
| Sc | 0.8043 | 0.5118 | 0.9002 |
| Sc | 0.8043 | 0.4882 | 0.4002 |
| N  | 0.9936 | 0.4989 | 0.4958 |
| N  | 0.9936 | 0.5011 | 0.9958 |
